# Supplementary material
Source: MDPI journal article supplement (https://www.mdpi.com/2076-3271/11/2/31)
Supplement: s1 [file s1]

**Table S1. Nucleotide sequences of primers for the construction of chemokine expression vector by the Gateway cloning system**

| Primer Name  | Bases | Nucleotide sequences                                                               |
|--------------|-------|------------------------------------------------------------------------------------|
| attB1 Cxcl9  | 69    | 5' –GGGGACAAGTTTGTACAAAAAAGCAGGCTTCGAAGGAGATAGAACC <b>ATG</b> AAGTCGCTGTTCTTTTCCT  |
| attB2 Cxcl9  | 53    | 5' –GGGGACCACTTTGTACAAGAAAGCTGGGTC <b>CTA</b> TGTAGTCTTCCTTGAACGAC                 |
| attB1 Cxcl10 | 69    | 5' –GGGGACAAGTTTGTACAAAAAAGCAGGCTTCGAAGGAGATAGAACC <b>ATG</b> AACCCAAGTGCTGCCGTCAT |
| attB2 Cxcl10 | 53    | 5' –GGGGACCACTTTGTACAAGAAAGCTGGGTC <b>CTA</b> AGGAGCCCTTTTAGACCTTT                 |
| attB1 Cxcl11 | 69    | 5' –GGGGACAAGTTTGTACAAAAAAGCAGGCTTCGAAGGAGATAGAACC <b>ATG</b> AACAGGAAGGTCACAGCCAT |
| attB2 Cxcl11 | 53    | 5' –GGGGACCACTTTGTACAAGAAAGCTGGGTC <b>CTA</b> CATGTTTGTACGCCTTAAAA                 |

Red characters indicate the initiation and stop codon, respectively. Blue characters indicate the coding region of the IFN-inducible chemokines.
